# Supplementary material for: A Cross-Sectional Study of Companion Animal-Derived Multidrug-Resistant Escherichia coli in Hangzhou, China
Source: PubMed Central journal article supplement (PMC10100847; doi:10.1128/spectrum.02113-22), 2023-02-22
Supplement: spectrum.02113-22-s0004.pdf [file spectrum.02113-22-s0004.pdf]

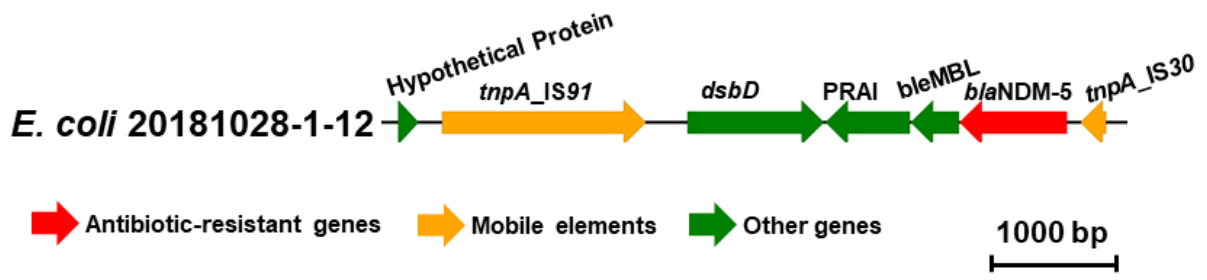

Figure S1. Genetic environments of the *bla*<sub>NDM-5</sub> gene in *E. coli* 20181028-1-12.

**Table S1. Percentages of *E. coli* in distinct categories of pets.**

| <b>Category</b>                                | <b>Sub-category<br/>(number of animals)</b> | <b>Number<br/>of isolates</b> | <b>Percentage<br/>(Isolate No./Total<br/>isolate No., %)</b> |
|------------------------------------------------|---------------------------------------------|-------------------------------|--------------------------------------------------------------|
| Host                                           | Cat (n=54)                                  | 113                           | 40.94                                                        |
|                                                | Dog (n=83)                                  | 163                           | 59.06                                                        |
| Health condition                               | Cats with healthy condition (n=8)           | 16                            | 5.80                                                         |
|                                                | Cats with disease (n=46)                    | 97                            | 35.15                                                        |
|                                                | Dogs with healthy condition (n=11)          | 23                            | 8.33                                                         |
|                                                | Dogs with disease (n=72)                    | 140                           | 50.72                                                        |
| Use of antimicrobials<br>in the previous month | Yes (n=25)                                  | 40                            | 14.49                                                        |
|                                                | No (n=112)                                  | 236                           | 85.51                                                        |

**Table S2 Antimicrobial resistance profiles of pet-derived *Escherichia coli* in 2018**

| <b>Resistance number</b> | <b>Resistance phenotype</b> | <b>Number of isolates</b> | <b>Percentage (%)</b> | <b>Total (%)</b> |
|--------------------------|-----------------------------|---------------------------|-----------------------|------------------|
| 0                        |                             | 25                        | 9.06%                 | 9.06%            |
| 1                        | AMC                         | 8                         | 2.90%                 | 17.75%           |
| 1                        | CIP                         | 4                         | 1.45%                 |                  |
| 1                        | CST                         | 1                         | 0.36%                 |                  |
| 1                        | SXT                         | 24                        | 8.70%                 |                  |
| 1                        | NAL                         | 11                        | 3.99%                 |                  |
| 1                        | TEM                         | 1                         | 0.36%                 |                  |
| 2                        | AMC-SXT                     | 24                        | 8.70%                 | 23.55%           |
| 2                        | AMC-NAL                     | 8                         | 2.90%                 |                  |
| 2                        | AMC-AXO                     | 1                         | 0.36%                 |                  |
| 2                        | AXO-SXT                     | 5                         | 1.81%                 |                  |
| 2                        | AXO-NAL                     | 1                         | 0.36%                 |                  |
| 2                        | CIP-SXT                     | 1                         | 0.36%                 |                  |
| 2                        | CST-SXT                     | 1                         | 0.36%                 |                  |
| 2                        | SXT-NAL                     | 17                        | 6.16%                 |                  |
| 2                        | AMC-CST                     | 1                         | 0.36%                 |                  |
| 2                        | AMC-SXT                     | 1                         | 0.36%                 |                  |
| 2                        | CST-SXT                     | 3                         | 1.09%                 |                  |
| 2                        | AMC-CIP-NAL                 | 2                         | 0.72%                 |                  |
| 3                        | AMC-AXO-SXT                 | 8                         | 2.90%                 | 19.20%           |
| 3                        | AMC-AXO-NAL                 | 1                         | 0.36%                 |                  |
| 3                        | AMC-SXT-NAL                 | 15                        | 5.43%                 |                  |
| 3                        | AXO-SXT-NAL                 | 5                         | 1.81%                 |                  |
| 3                        | AMC-CST-SXT                 | 1                         | 0.36%                 |                  |
| 3                        | AMC-SXT-NAL                 | 4                         | 1.45%                 |                  |
| 3                        | AMC-AXO-CIP-NAL             | 1                         | 0.36%                 |                  |
| 3                        | AMC-CIP-SXT-NAL             | 13                        | 4.71%                 |                  |
| 3                        | AXO-CIP-SXT-NAL             | 1                         | 0.36%                 |                  |
| 3                        | CIP-CST-SXT-NAL             | 4                         | 1.45%                 |                  |
| 4                        | AMC-AXO-SXT-NAL             | 15                        | 5.43%                 | 18.84%           |
| 4                        | AMC-AXO-NAL-TEM             | 1                         | 0.36%                 |                  |
| 4                        | AMC-SXT-NAL-TEM             | 1                         | 0.36%                 |                  |
| 4                        | AMC-CST-SXT-NAL             | 1                         | 0.36%                 |                  |
| 4                        | AMC-AXO-CIP-SXT-NAL         | 6                         | 2.17%                 |                  |
| 4                        | AMC-AXO-CIP-SXT-NAL         | 28                        | 10.14%                |                  |

|   |                             |    |       |        |
|---|-----------------------------|----|-------|--------|
| 5 | AMC-AXO-SXT-NAL-TEM         | 1  | 0.36% | 10.14% |
| 5 | AMC-AXO-CIP-CST-SXT-NAL     | 1  | 0.36% |        |
| 5 | AMC-AXO-CIP-SXT-NAL-TEM     | 10 | 3.62% |        |
| 5 | AMC-AXO-CIP-SXT-NAL-TEM     | 14 | 5.07% |        |
| 5 | AMC-CIP-CST-SXT-NAL-TEM     | 2  | 0.72% |        |
| 6 | AMC-AXO-CIP-CST-SXT-NAL-TEM | 4  | 1.45% | 1.45%  |

Note: The full names of each abbreviation are listed. AMC: Amoxicillin-clavulanic acid, AXO: ceftriaxone, SXT: Trimethoprim-sulfamethoxazole, NAL: Nalidixic acid, CIP: Ciprofloxacin, TEM: Temocillin, CST: Colistin, and IMI: Imipenem

**Table S3. Resistance rate of pet-derived *E. coli* to different antimicrobials**

| Antimicrobial categories                   | Antimicrobial agents          | Abbreviation | Percentage of antimicrobial resistant isolate |                                 |                                 |
|--------------------------------------------|-------------------------------|--------------|-----------------------------------------------|---------------------------------|---------------------------------|
|                                            |                               |              | (Number of isolates)                          |                                 |                                 |
|                                            |                               |              | All isolates<br>(n=276)                       | Dog-derived isolates<br>(n=163) | Cat-derived isolates<br>(n=113) |
| Penicillins/ $\beta$ -lactamase inhibitors | Amoxicillin-clavulanic acid   | AMC          | 62.3 (172)                                    | 62.0 (101)                      | 62.8 (71)                       |
| 3rd generation cephalosporins              | Ceftriaxone                   | AXO          | 37.3 (103)                                    | 45.4 (74)                       | 25.7 (29)                       |
| Folate pathway inhibitors                  | Trimethoprim-sulfamethoxazole | SXT          | 76.1 (210)                                    | 82.8 (135)                      | 66.4 (75)                       |
| 1 <sup>st</sup> generation Quinolones      | Nalidixic acid                | NAL          | 60.5 (167)                                    | 63.8 (104)                      | 55.8 (63)                       |
| 3 <sup>rd</sup> generation Quinolones      | Ciprofloxacin                 | CIP          | 33.0 (91)                                     | 39.9 (65)                       | 23.0 (26)                       |
| Penicillins                                | Temocillin                    | TEM          | 12.3 (34)                                     | 17.8 (29)                       | 4.4 (5)                         |
| Polymyxins                                 | Colistin                      | CST          | 6.9 (19)                                      | 10.4 (17)                       | 1.8 (2)                         |
| Carbapenems                                | Imipenem                      | IMI          | 15.6 (43)                                     | 22.1 (36)                       | 6.2 (7)                         |

**Table S4. Percentage of ST and ST clonal complex of the pet-derived *E. coli* in 2018.**

| <b>ST</b> | <b>ST clonal complex (CC)</b> | <b>No. of isolates</b> | <b>Percentage (%)</b> | <b>No. of isolates of ST clonal complex</b> | <b>Percentage of ST clonal complex (%)</b> |
|-----------|-------------------------------|------------------------|-----------------------|---------------------------------------------|--------------------------------------------|
| 12        | ST12 CC                       | 18                     | 6.52%                 | 23                                          | 8.33%                                      |
| 961       | ST12 CC                       | 5                      | 1.81%                 |                                             |                                            |
| 10        | ST10 CC                       | 8                      | 2.90%                 | 22                                          | 7.97%                                      |
| 48        | ST10 CC                       | 6                      | 2.17%                 |                                             |                                            |
| 167       | ST10 CC                       | 2                      | 0.72%                 |                                             |                                            |
| 209       | ST10 CC                       | 1                      | 0.36%                 |                                             |                                            |
| 617       | ST10 CC                       | 4                      | 1.45%                 |                                             |                                            |
| 1638      | ST10 CC                       | 1                      | 0.36%                 |                                             |                                            |
| 73        | ST73 CC                       | 10                     | 3.62%                 | 17                                          | 6.16%                                      |
| 1262      | ST73 CC                       | 6                      | 2.17%                 |                                             |                                            |
| 1735      | ST73 CC                       | 1                      | 0.36%                 |                                             |                                            |
| 101       | ST101 CC                      | 13                     | 4.71%                 | 17                                          | 6.16%                                      |
| 359       | ST101 CC                      | 4                      | 1.45%                 |                                             |                                            |
| 648       | ST648 CC                      | 11                     | 3.99%                 | 12                                          | 4.35%                                      |
| 2011      | ST648 CC                      | 1                      | 0.36%                 |                                             |                                            |
| 23        | ST23 CC                       | 2                      | 0.72%                 | 11                                          | 3.99%                                      |
| 88        | ST23 CC                       | 4                      | 1.45%                 |                                             |                                            |
| 90        | ST23 CC                       | 1                      | 0.36%                 |                                             |                                            |
| 410       | ST23 CC                       | 2                      | 0.72%                 |                                             |                                            |
| 423       | ST23 CC                       | 1                      | 0.36%                 |                                             |                                            |
| 2188      | ST23 CC                       | 1                      | 0.36%                 |                                             |                                            |
| 58        | ST155 CC                      | 7                      | 2.54%                 | 10                                          | 3.62%                                      |
| 155       | ST155 CC                      | 3                      | 1.09%                 |                                             |                                            |
| 448       | ST448 CC                      | 7                      | 2.54%                 | 7                                           | 2.54%                                      |
| 156       | ST156 CC                      | 5                      | 1.81%                 | 5                                           | 1.81%                                      |
| 453       | ST86 CC                       | 2                      | 0.72%                 | 3                                           | 1.09%                                      |
| 641       | ST86 CC                       | 1                      | 0.36%                 |                                             |                                            |
| 46        | ST46 CC                       | 3                      | 1.09%                 | 3                                           | 1.09%                                      |
| 162       | ST469 CC                      | 3                      | 1.09%                 | 3                                           | 1.09%                                      |
| 206       | ST206 CC                      | 2                      | 0.72%                 | 3                                           | 1.09%                                      |
| 5086      | ST206 CC                      | 1                      | 0.36%                 |                                             |                                            |
| 328       | ST278 CC                      | 3                      | 1.09%                 | 3                                           | 1.09%                                      |
| 181       | ST168 CC                      | 2                      | 0.72%                 | 2                                           | 0.72%                                      |
| 38        | ST38 CC                       | 2                      | 0.72%                 | 2                                           | 0.72%                                      |
| 398       | ST398 CC                      | 2                      | 0.72%                 | 2                                           | 0.72%                                      |
| 1737      | ST205 CC                      | 1                      | 0.36%                 | 1                                           | 0.36%                                      |
| 349       | ST349 CC                      | 1                      | 0.36%                 | 1                                           | 0.36%                                      |

|      |          |   |       |   |       |
|------|----------|---|-------|---|-------|
| 602  | ST446 CC | 1 | 0.36% | 1 | 0.36% |
| 13   | ST13 CC  | 1 | 0.36% | 1 | 0.36% |
| 131  | ST131 CC | 1 | 0.36% | 1 | 0.36% |
| 69   | ST69 CC  | 1 | 0.36% | 1 | 0.36% |
| 2165 | None     | 8 | 2.90% | / | /     |
| 127  | None     | 6 | 2.17% | / | /     |
| 3285 | None     | 6 | 2.17% | / | /     |
| 75   | None     | 5 | 1.81% | / | /     |
| 224  | None     | 5 | 1.81% | / | /     |
| 372  | None     | 5 | 1.81% | / | /     |
| 929  | None     | 5 | 1.81% | / | /     |
| 117  | None     | 4 | 1.45% | / | /     |
| 457  | None     | 4 | 1.45% | / | /     |
| 2086 | None     | 4 | 1.45% | / | /     |
| 2569 | None     | 4 | 1.45% | / | /     |
| 83   | None     | 3 | 1.09% | / | /     |
| 211  | None     | 3 | 1.09% | / | /     |
| 4212 | None     | 3 | 1.09% | / | /     |
| 6015 | None     | 3 | 1.09% | / | /     |
| 6422 | None     | 3 | 1.09% | / | /     |
| 6560 | None     | 3 | 1.09% | / | /     |
| 7865 | None     | 3 | 1.09% | / | /     |
| 8682 | None     | 3 | 1.09% | / | /     |
| 409  | None     | 2 | 0.72% | / | /     |
| 942  | None     | 2 | 0.72% | / | /     |
| 1147 | None     | 2 | 0.72% | / | /     |
| 1196 | None     | 2 | 0.72% | / | /     |
| 1290 | None     | 2 | 0.72% | / | /     |
| 1716 | None     | 2 | 0.72% | / | /     |
| 2175 | None     | 2 | 0.72% | / | /     |
| 2522 | None     | 2 | 0.72% | / | /     |
| 2690 | None     | 2 | 0.72% | / | /     |
| 187  | None     | 1 | 0.36% | / | /     |
| 327  | None     | 1 | 0.36% | / | /     |
| 603  | None     | 1 | 0.36% | / | /     |
| 697  | None     | 1 | 0.36% | / | /     |
| 744  | None     | 1 | 0.36% | / | /     |
| 761  | None     | 1 | 0.36% | / | /     |
| 971  | None     | 1 | 0.36% | / | /     |
| 1118 | None     | 1 | 0.36% | / | /     |
| 1495 | None     | 1 | 0.36% | / | /     |
| 2164 | None     | 1 | 0.36% | / | /     |
| 2178 | None     | 1 | 0.36% | / | /     |

---

|      |      |   |       |   |   |
|------|------|---|-------|---|---|
| 2448 | None | 1 | 0.36% | / | / |
| 4946 | None | 1 | 0.36% | / | / |
| 4995 | None | 1 | 0.36% | / | / |
| 5131 | None | 1 | 0.36% | / | / |
| 5683 | None | 1 | 0.36% | / | / |
| 7063 | None | 1 | 0.36% | / | / |

---

"/" indicates isolates that are not belonging to any ST CC.



**Table S5 Basic information of pets.**

| Category                    | Sub-category                     | Number of animals | Percentage (%) |
|-----------------------------|----------------------------------|-------------------|----------------|
| Age                         | 0~1Y                             | 62                | 45.26          |
|                             | 1~6Y                             | 56                | 40.88          |
|                             | 6Y~                              | 19                | 13.87          |
| Sex                         | Male                             | 79                | 57.66          |
|                             | Female                           | 58                | 42.34          |
| Breed(cat)                  | British Shorthair cat            | 20                | 37.74          |
|                             | Local species                    | 12                | 22.64          |
|                             | Dragon Li                        | 5                 | 9.43           |
|                             | Ragdoll                          | 5                 | 9.43           |
|                             | Chausie                          | 1                 | 1.89           |
|                             | Siamese                          | 2                 | 3.77           |
|                             | Garfield                         | 2                 | 3.77           |
|                             | American Shorthair               | 2                 | 3.77           |
|                             | Scottish Fold                    | 1                 | 1.89           |
|                             | Chinchilla                       | 1                 | 1.89           |
|                             | Maine                            | 1                 | 1.89           |
|                             | British shorthair cat (blue fur) | 1                 | 1.89           |
|                             | Breed(dog)                       | Poodle            | 19             |
| Welsh corgi pembroke        |                                  | 13                | 15.48          |
| Local species               |                                  | 8                 | 9.52           |
| Siberian husky              |                                  | 6                 | 7.14           |
| Border collie               |                                  | 4                 | 4.76           |
| Labrador retriever          |                                  | 5                 | 5.95           |
| Bichon Frise                |                                  | 6                 | 7.14           |
| Shiba Inu                   |                                  | 4                 | 4.76           |
| West highland white terrier |                                  | 2                 | 2.38           |
| French bulldog              |                                  | 2                 | 2.38           |
| Beagle                      |                                  | 2                 | 2.38           |
| Siberian Husky              |                                  | 2                 | 2.38           |
| Pomeranian                  |                                  | 2                 | 2.38           |
| Bedlington terriers         |                                  | 1                 | 1.19           |
| Standard Schnauzer          |                                  | 1                 | 1.19           |
| Canis lupus familiaris      |                                  | 1                 | 1.19           |
| Samoyed                     |                                  | 1                 | 1.19           |
| Cocker Spaniel              |                                  | 1                 | 1.19           |
| Canis lupus familiaris      |                                  | 1                 | 1.19           |
| Others                      |                                  | 3                 | 3.57           |

**Dataset 1. Genetic characterization of carbapenem-resistant *E. coli* from 2018.**
